# Supplementary material for: Inherited salt-losing tubulopathies are associated with immunodeficiency due to impaired IL-17 responses
Source: PubMed Central journal article supplement (PMC7459119; doi:10.1038/s41467-020-18184-3), 2020-08-31
Supplement: 41467_2020_18184_MOESM3_ESM.pdf [file 41467_2020_18184_MOESM3_ESM.pdf]

## Reporting Summary

Nature Research wishes to improve the reproducibility of the work that we publish. This form provides structure for consistency and transparency in reporting. For further information on Nature Research policies, see our [Editorial Policies](#) and the [Editorial Policy Checklist](#).

### Statistics

For all statistical analyses, confirm that the following items are present in the figure legend, table legend, main text, or Methods section.

n/a Confirmed

- |                                     |                                     |                                                                                                                                                                                                                                                            |
|-------------------------------------|-------------------------------------|------------------------------------------------------------------------------------------------------------------------------------------------------------------------------------------------------------------------------------------------------------|
| <input type="checkbox"/>            | <input checked="" type="checkbox"/> | The exact sample size ( $n$ ) for each experimental group/condition, given as a discrete number and unit of measurement                                                                                                                                    |
| <input type="checkbox"/>            | <input checked="" type="checkbox"/> | A statement on whether measurements were taken from distinct samples or whether the same sample was measured repeatedly                                                                                                                                    |
| <input type="checkbox"/>            | <input checked="" type="checkbox"/> | The statistical test(s) used AND whether they are one- or two-sided<br><i>Only common tests should be described solely by name; describe more complex techniques in the Methods section.</i>                                                               |
| <input checked="" type="checkbox"/> | <input type="checkbox"/>            | A description of all covariates tested                                                                                                                                                                                                                     |
| <input type="checkbox"/>            | <input checked="" type="checkbox"/> | A description of any assumptions or corrections, such as tests of normality and adjustment for multiple comparisons                                                                                                                                        |
| <input type="checkbox"/>            | <input checked="" type="checkbox"/> | A full description of the statistical parameters including central tendency (e.g. means) or other basic estimates (e.g. regression coefficient) AND variation (e.g. standard deviation) or associated estimates of uncertainty (e.g. confidence intervals) |
| <input type="checkbox"/>            | <input checked="" type="checkbox"/> | For null hypothesis testing, the test statistic (e.g. $F$ , $t$ , $r$ ) with confidence intervals, effect sizes, degrees of freedom and $P$ value noted<br><i>Give <math>P</math> values as exact values whenever suitable.</i>                            |
| <input checked="" type="checkbox"/> | <input type="checkbox"/>            | For Bayesian analysis, information on the choice of priors and Markov chain Monte Carlo settings                                                                                                                                                           |
| <input checked="" type="checkbox"/> | <input type="checkbox"/>            | For hierarchical and complex designs, identification of the appropriate level for tests and full reporting of outcomes                                                                                                                                     |
| <input checked="" type="checkbox"/> | <input type="checkbox"/>            | Estimates of effect sizes (e.g. Cohen's $d$ , Pearson's $r$ ), indicating how they were calculated                                                                                                                                                         |

*Our web collection on [statistics for biologists](#) contains articles on many of the points above.*

### Software and code

Policy information about [availability of computer code](#)

Data collection Data was collected and stored using microsoft excel software.

Data analysis Flow cytometry data was analysed using FlowJo v10 software. Sodium images were analysed using Matlab and ITKSnap v3.0 software. Western blot analysis was undertaken using ImageJ. Bacterial identification was undertaken using the MALDI Biotyper 3.0 software programme. Statistical analysis was undertaken using Graphpad Prism v7.

For manuscripts utilizing custom algorithms or software that are central to the research but not yet described in published literature, software must be made available to editors and reviewers. We strongly encourage code deposition in a community repository (e.g. GitHub). See the Nature Research [guidelines for submitting code & software](#) for further information.

### Data

Policy information about [availability of data](#)

All manuscripts must include a [data availability statement](#). This statement should provide the following information, where applicable:

- Accession codes, unique identifiers, or web links for publicly available datasets
- A list of figures that have associated raw data
- A description of any restrictions on data availability

The data that support the findings of this study are outlined within the Source Data File. Any additional data are freely available upon request from the corresponding author upon reasonable request.

## Field-specific reporting

Please select the one below that is the best fit for your research. If you are not sure, read the appropriate sections before making your selection.

- Life sciences  Behavioural & social sciences  Ecological, evolutionary & environmental sciences

For a reference copy of the document with all sections, see [nature.com/documents/nr-reporting-summary-flat.pdf](https://www.nature.com/documents/nr-reporting-summary-flat.pdf)

## Life sciences study design

All studies must disclose on these points even when the disclosure is negative.

|                 |                                                                                                                                                                                              |
|-----------------|----------------------------------------------------------------------------------------------------------------------------------------------------------------------------------------------|
| Sample size     | Pragmatic approach to enrol as many patients as possible                                                                                                                                     |
| Data exclusions | Nil                                                                                                                                                                                          |
| Replication     | All analyses were successfully undertaken in technical replicates of at least 2 unless otherwise specified                                                                                   |
| Randomization   | This was an observational study without intervention and hence randomization was not applicable.                                                                                             |
| Blinding        | Logistical reasons (limited research staff) meant laboratory analyses were undertaken openly. As above, this study was observational and hence blinding of an intervention was not relevant. |

## Reporting for specific materials, systems and methods

We require information from authors about some types of materials, experimental systems and methods used in many studies. Here, indicate whether each material, system or method listed is relevant to your study. If you are not sure if a list item applies to your research, read the appropriate section before selecting a response.

### Materials & experimental systems

- | n/a                                 | Involvement in the study                                        |
|-------------------------------------|-----------------------------------------------------------------|
| <input type="checkbox"/>            | <input checked="" type="checkbox"/> Antibodies                  |
| <input checked="" type="checkbox"/> | <input type="checkbox"/> Eukaryotic cell lines                  |
| <input checked="" type="checkbox"/> | <input type="checkbox"/> Palaeontology and archaeology          |
| <input checked="" type="checkbox"/> | <input type="checkbox"/> Animals and other organisms            |
| <input type="checkbox"/>            | <input checked="" type="checkbox"/> Human research participants |
| <input checked="" type="checkbox"/> | <input type="checkbox"/> Clinical data                          |
| <input checked="" type="checkbox"/> | <input type="checkbox"/> Dual use research of concern           |

### Methods

- | n/a                                 | Involvement in the study                           |
|-------------------------------------|----------------------------------------------------|
| <input checked="" type="checkbox"/> | <input type="checkbox"/> ChIP-seq                  |
| <input type="checkbox"/>            | <input checked="" type="checkbox"/> Flow cytometry |
| <input checked="" type="checkbox"/> | <input type="checkbox"/> MRI-based neuroimaging    |

## Antibodies

Antibodies used

Antibodies used are outlined within the methods section of the manuscript, with the relevant company identifiers. They have also been summarised within Supplementary Table 10, which is copied below.

#### FACS STAINING

T cell proliferation and activation

Fixable viability dye - efluor450 invitrogen 65-0863-14 1 in 1000

anti human CD4 - FITC biolegend 300538 1 in 25

anti human Ki-67 - APC biolegend 350514 1 in 40

anti human CD25 - PE/Cy7 biolegend 302612 1 in 40

T cell subset analysis (stimulated cells and intracellular staining)

anti human CD4 - FITC biolegend 300538 1 in 20

anti human IFN $\gamma$  - APC biolegend 502512 1 in 40

anti-human IL17 - PE biolegend 512306 1 in 40

anti-human IL4 - PE/Cy7 biolegend 500824 1 in 40

T cell subset analysis (unstimulated cells and surface staining)

anti-human CD3 - PE/Cy5 biolegend 300410 1 in 80

anti human CD4 - FITC biolegend 300538 1 in 25

anti-human CD8 - BV785 biolegend 301046 1 in 40

anti human CD45RA - AlexaFluor700 biolegend 304120 1 in 40

anti human CD45RO-PE biolegend 304206 1 in 40

## Th17 and Tc17 analysis

Fixable viability dye - eFluor450 invitrogen 65-0863-14 1 in 1000  
 anti human CD4 - FITC biolegend 300538 1 in 20  
 anti-human CD8 - PE/Cy7 biolegend 300914 1 in 40  
 anti-human IL17 - PE biolegend 512306 1 in 40

## Phosphostain (STAT1 and STAT3)

anti human CD4 - FITC biolegend 300538 1 in 20  
 STAT3 (pY705) - PE BD Biosciences 612569 1 in 5  
 STAT1 (pY701) - Alexa 647 BD Biosciences 612597 1 in 5

## NCC expression on lymphocytes

SLC12A3 Polyclonal antibody (rabbit) Life technologies PA5-80004 1 in 50  
 Goat anti-rabbit APC Invitrogen A-10931 1 in 40  
 anti human CD4 - FITC biolegend 300538 1 in 25  
 anti-human CD8 - PE/Cy7 biolegend 300914 1 in 40  
 anti human CD45RA - AlexaFluor700 biolegend 304120 1 in 40

anti human CD45 - FITC biolegend 304006 1 in 50  
 anti human CD3 - BV711 biolegend 317328 1 in 50  
 anti human CD56 - BV510 biolegend 318340 1 in 50

anti human CD19 - PE/Cy7 invitrogen 25-0199-42 1 in 40

## Calcium flux

Indo-1, AM, cell permeant thermo fisher 11223 1 in 500  
 anti-human CD4 - PerCP/Cy5.5 biolegend 300530 1 in 40  
 biotinylated anti-human CD3 biolegend 317320 10ug per ml

## IL23 receptor expression

IL-23 receptor - PE R&D Systems FAB14001P 1 in 25  
 anti human CD4 - FITC biolegend 300538 1 in 20

## Monocyte analysis

anti-human CD14 - APC/Cy7 biolegend 325619 1 in 50  
 anti-human CD16 - FITC biolegend 302006 1 in 50  
 anti-human TNF - Alexaflour488 BD Biosciences 557722 1 in 40

## NK cell analysis

anti human CD45 - FITC biolegend 304006 1 in 50  
 anti human CD3 - BV711 biolegend 317328 1 in 50  
 anti human CD56 - BV510 biolegend 318340 1 in 50  
 anti human CD16 - PE/Cy7 biolegend 302016 1 in 40  
 anti human IFNg - APC biolegend 502512 1 in 40

## WESTERN BLOT

Rabbit SGK1 polyclonal antibody Abcam ab43606 1 in 900  
 Mouse GAPDH monoclonal antibody Abcam ab8245 1 in 10000  
 Anti-rabbit HRP Abcam ab205718 1 in 3000  
 Anti-mouse HRP Abcam ab205719 1 in 5000

## Validation

Validation information and associated references for each antibody used are outlined below.

## FACS STAINING

## T cell proliferation and activation

## Fixable viability dye - eFluor450

Fixable Viability Dye eFluor® 450 has been pre-titrated and tested by flow cytometric analysis of mouse thymocytes.

1. Ulges A, Witsch EJ, Pramanik G, Klein M, Birkner K, Bühler U, Wasser B, Luessi F, Stergiou N, Dietzen S, Brühl TJ, Bohn T, Bündgen G, Kunz H, Waisman A, Schild H, Schmitt E, Zipp F, Bopp T. Protein kinase CK2 governs the molecular decision between encephalitogenic TH17 cell and Treg cell development. *Proc Natl Acad Sci U S A*. 2016 Sep 6;113(36):10145-50. (FVD eFluor 450, FC, PubMed). 2. Schütze N, Trojandt S, Kuhn S, Tomm JM, von Bergen M, Simon JC, Polte T. Allergen-Induced IL-6 Regulates IL-9/IL-17A Balance in CD4+ T Cells in Allergic Airway Inflammation. *J Immunol*. 2016 Oct 1;197(7):2653-64. (FVD eFluor 450, FC, PubMed). 3. Ballke C, Gran E, Bækkevold ES, Jahnsen FL. Characterization of Regulatory T-Cell Markers in CD4+ T Cells of the Upper Airway Mucosa. *PLoS One*. 2016 Feb 11;11(2):e0148826. (FVD eFluor 450, FC, PubMed)

## anti human CD4 - FITC

Each lot of this antibody is quality control tested by immunofluorescent staining with flow cytometric analysis.

## "Application References

Knapp W, et al. 1989. Leucocyte Typing IV. Oxford University Press. New York. (Activ)  
 Moir S, et al. 1999. J. Virol. 73:7972. (Activ)  
 Deng MC, et al. 1995. Circulation 91:1647. (IHC)  
 Friedman T, et al. 1999. J. Immunol. 162:5256. (IHC)  
 Mack CL, et al. 2004. Pediatr. Res. 56:79. (IHC)  
 Lan RY, et al. 2006. Hepatology 43:729.  
 Zenaro E, et al. 2009. J. Leukoc. Biol. 86:1393. (FC) PubMed  
 Yoshino N, et al. 2000. Exp. Anim. (Tokyo) 49:97. (FC)  
 Stoeckius M, et al. 2017. Nat. Methods. 14:865. (PG)

## Product Citations

Zenaro E, et al. 2009. J Leukoc Biol. 86:1393. PubMed  
 Tamai Y, et al. 2013. J Immunol. 190:4382. PubMed  
 Choudhry V, et al. 2006. Biochem Biophys Res Commun. 348:1107. PubMed  
 Han L, et al. 2014. J Biol Chem. 289:25546. PubMed  
 Luo X, et al. 2015. J Biol Chem. 290: 28675 - 28682. PubMed  
 Wahl S, et al. 2016. Nature. 541:81-86. PubMed  
 Rolandelli A, et al. 2017. Sci Rep. 7:40666. PubMed  
 Meng Y, et al. 2017. Cell Death Dis. . 10.1038/cddis.2017.505. PubMed  
 Goletz C, et al. 2018. Front Immunol. 9:1614. PubMed  
 Ickrath P, et al. 2019. Biomed Rep. 10:119. PubMed  
 Iio K, et al. 2019. Sci Rep. 9:813. PubMed  
 Alhaj Hussien K, et al. 2017. Immunity. 47:680. PubMed"

## anti human Ki-67 - APC

"Each lot of this antibody is quality control tested by the following Ki-67 staining protocol: 1. Prepare 70% ethanol and chill at -20°C.

2. Prepare target cells of interest and wash 2X with PBS by centrifuge at 350xg for 5 minutes.
3. Discard supernatant and loosen the cell pellet by vortexing.
4. Add 3 ml cold 70% ethanol drop by drop to the cell pellet while vortexing.
5. Continue vortexing for 30 seconds and then incubate at -20°C for 1 hour.
6. Wash 3X with BioLegend Cell Staining Buffer and then resuspend the cells at the concentration of 0.5-10 x 10<sup>6</sup>/ml.
7. Mix 100 µl cell suspension with proper fluorochrome-conjugated Ki-67 antibody and incubate at room temperature in the dark for 30 minutes.
8. Wash 2X with BioLegend Cell Staining Buffer and then resuspend in 0.5 ml cell staining buffer for flow cytometric analysis."

## "Application References

Gerdes J, et al. 1983. Int. J. Cancer 31:13. (IHC)  
 Gerdes J, et al. 1984. J. Immunol. 133:1710. (ICFC)  
 Schluter C, et al. 1993 J. Cell Biol. 123:513. (IHC, WB)  
 Bading H, et al. 1989 Exp. Cell. Res. 185:50. (IF)  
 Guha P, et al. 2013. PNAS. 110:5052. PubMed

## Product Citations

Maine C, et al. 2014. J Immunol. 192:1415. PubMed  
 Nodomi S, et al. 2016. Oncogene. 10.1038/onc.2016.72. PubMed  
 Yumoto K, et al. 2016. Sci Rep. 6:36520. PubMed  
 Wu K, et al. 2018. Oncol Rep. 40:3523. PubMed"

## anti human CD25 - PE/Cy7

Each lot of this antibody is quality control tested by immunofluorescent staining with flow cytometric analysis.

## "Application References

Schlossman S, et al. Eds. 1995. Leucocyte Typing V. Oxford University Press. New York.  
 Kmiecik M, et al. 2009. J. Transl. Med. 7:89. (FC) PubMed  
 Ernst CW, et al. 2007. Clin. Exp. Immunol. 148:271. (ICC) PubMed

## Product Citations

Weinberg A, et al. 2015. PLoS One. 10:122431. PubMed  
 Groen B, et al. 2015. Sci Rep. 5: 13618. PubMed  
 Couturier J, et al. 2016. Retrovirology. 13:30. PubMed  
 Palamides P, et al. 2016. Dis Model Mech. 9: 985 - 997. PubMed  
 Mackroth M, et al. 2016. PLoS Pathog. 12:e1005909. PubMed  
 Sayin I, et al. 2018. J Exp Med. 7:40286. PubMed  
 Kagoya Y, et al. 2018. Nat Commun. 9:1915. PubMed  
 Barry KC, et al. 2018. Nat Med. 24:1178. PubMed  
 Schmidleithner L et al. 2019. Immunity. 50(5):1232-1248 . PubMed  
 Abigail E Overacre-Delgoffe et al. 2017. Cell. 169(6):1130-1141 . PubMed  
 Gorczynski RM, et al. 2017. Immunology. 150:418. PubMed  
 Levring TB, et al. 2019. Sci Rep. 9:16725. PubMed"

T cell subset analysis (stimulated cells and intracellular staining)

## anti human CD4 - FITC

As above

## anti human IFNg - APC

Each lot of this antibody is quality control tested by intracellular immunofluorescent staining with flow cytometric analysis.

"Application References

Meager A, et al. 1984. J. Interferon Res. 4:619. (Neut)

Meager A, 1987. Lymphokines and Interferons: A Practical Approach. IRL Press Ltd, Oxford, p. 105. (Neut)

Sester M, et al. 2002. J. Virol. 76:3748. (ICFC)

Infante-Duarte C, et al. 2000 J. Immunol. 165:6107. (ICFC)

Goodier M, et al. 2000. J. Immunol. 165:139. (ELISA)

Chen H, et al. 2005. J. Immunol. 175:591. (ICFC)

Smeltz RB, 2007. J. Immunol. 178:4786. (ICFC)

Iwamoto S, et al. 2007. J. Immunol. 179:1449. (ICFC) PubMed

Yoshino N, et al. 2000. Exp. Anim. (Tokyo) 49:97. (ICFC)

Product Citations

Norian L, et al. 2009. Cancer Res. 69:3086. PubMed

Longhi M, et al. 2014. PLoS One. 9:87956. PubMed

Goetzmann J, et al. 2014. Proc Natl Acad Sci U S A. 111:8873. PubMed

Tian X, et al. 2015. J Immunol. 194:3873. PubMed

Zhang X, et al. 2017. J Immunol. 10.4049/jimmunol.1602183. PubMed

Draganov DD, et al. 2019. J Transl Med. 17:100. PubMed

Du Q, et al. 2018. J Immunol. 201:533. PubMed

Wei J, et al. 2019. J Immunother Cancer. 7:209. PubMed

Yang C, et al. 2019. Nat Commun. 10:3931. PubMed

Roybal KT et al. 2016. Cell. 167(2):419-432. PubMed

Waight JD, et al. 2018. Cancer Cell. 33:1033. PubMed

Pahl JHW, et al. 2018. Cancer Immunol Res. 0.609027778. PubMed"

## anti-human IL17 - PE

Each lot of this antibody is quality control tested by intracellular immunofluorescent staining with flow cytometric analysis

"Product Citations

Fraccaroli L, et al. 2015. J Leukoc Biol. 98: 49 - 58. PubMed

Lu T, et al. 2016. PLoS One. 11: 0148044. PubMed

Chruewkamlow N, et al. 2016. PLoS One. 11: 0145983. PubMed

Tomalka J, Jesus T, Ramakrishnan P 2016. J Leukoc Biol. 100: 111 - 120. PubMed

Tankou SK, et al. 2018. Ann Neurol. 83:1147. PubMed

Gabrion A, et al. 2017. J Allergy Clin Immunol. 139:1641. PubMed"

## anti-human IL4 - PE/Cy7

Each lot of this antibody is quality control tested by intracellular immunofluorescent staining with flow cytometric analysis

"Application References

Chretien I, et al. 1989. J. Immunol. Methods 117:67. (ELISA Detection, Neut)

Ramanathan L, et al. 1993. Biochem. 32:3549. (Neut)

Abrams J, et al. 1992. Immunol. Rev. 127:5. (ELISA Detection, Neut)

Mahanty S, et al. 1992. J. Immunol. 148:3567. (ELISPOT Detection)

Klinman D, et al. 1994. Curr. Prot. Immunol. John Wiley and Sons New York. Unit 6.19. (ELISPOT Detection)

Prussin C, et al. 1995. J. Immunol. Methods 188:117. (ICFC)

Raqib R, et al. 1995. Infect. Immun. 63:289.

Andersson J, et al. 1994. Immunology 83:16.

Iwamoto S, et al. 2007. J. Immunol. 179:1449. (ICFC) PubMed

Kubota M, et al. 1997. J. Immunol. 158:5321.

Dzhagalov I, et al. 2007. J. Immunol. 178:2113. PubMed

Kroneke MA, et al. 2012. J. Immunol. 188:3734. PubMed

Product Citations

Jiang J, et al. 2017. Arthritis Res Ther. 10.1186/s13075-017-1261-9. PubMed

Jardine L, et al. 2019. Nat Commun. 10:1999. PubMed

Zeng W, et al. 2017. Front Immunol. 0.806944444. PubMed"

## T cell subset analysis (unstimulated cells and surface staining)

## anti-human CD3 - PE/Cy5

Each lot of this antibody is quality control tested by immunofluorescent staining with flow cytometric analysis.

"Application References

Salmeron A, et al. 1991. J. Immunol. 147:3047. (IP)

Graves J, et al. 1991. J. Immunol. 146:2102. (Activ)

Lafont V, et al. 2000. J. Biol. Chem. 275:19282. (Activ)

Ryschich E, et al. 2003. Tissue Antigens 62:48. (IHC)

Thompson AG, et al. 2004. *J. Immunol.* 173:1671. (Activ)  
 Sakkas LI, et al. 1998. *Clin. Diagn. Lab. Immun.* 5:430. (IHC)  
 Mack CL, et al. 2004. *Pediatr. Res.* 56:79. (IHC)  
 Thakral D, et al. 2008. *J. Immunol.* 180:7431. (FC) PubMed  
 Van Dongen JJM, et al. 1988. *Blood* 71:603. (WB)  
 Yoshino N, et al. 2000. *Exp. Anim. (Tokyo)* 49:97. (FC)  
 Pollard, K. et al. 1987. *J. Histochem. Cytochem.* 35:1329. (IHC)  
 Luckashenak N, et al. 2013. *J. Immunol.* 190:27. PubMed  
 Product Citations  
 Jung J, et al. 2019. *Cell Rep.* 26:1906. PubMed  
 Serra–Peinado C, et al. 2019. *Nat Commun.* 10:3705. PubMed  
 Cassetta L et al. 2019. *Cancer Cell.* 35(4):588-602 . PubMed"

anti human CD4 - FITC  
 As above

anti-human CD8 - BV785

Each lot of this antibody is quality control tested by immunofluorescent staining with flow cytometric analysis.

"Application References

Knapp W, et al. Eds. 1989. *Leucocyte Typing IV.* Oxford University Press. New York.  
 Schlossman S, et al. Eds. 1995. *Leucocyte Typing V.* Oxford University Press. New York.  
 Mack CL, et al. 2004. *Pediatr. Res.* 56:79. (IHC)  
 Magidovich E, et al. 2007. *P. Natl. Acad. Sci. USA* 104:13022.  
 Thakral D, et al. 2008. *J. Immunol.* 180:7431. PubMed  
 Kmiecik M, et al. 2009. *J. Transl. Med.* 7:89. (FC) PubMed  
 Thakral D, et al. 2008. *J. Immunol.* 180:7431. (FC) PubMed  
 Yoshino N, et al. 2000. *Exp. Anim. (Tokyo)* 49:97. (FC)  
 Rout N, et al. 2010. *PLoS One* 5:e9787. (FC)  
 Stoeckius M, et al. 2017. *Nat. Methods.* 14:865. (PG)

Product Citations

Taraldsrud E, et al. 2017. *Journal of Autoimmunity.* 10.1016/j.jaut.2017.04.004. PubMed  
 Mukhopadhyay M, et al. 2017. *J Immunol.* 10.4049/jimmunol.1700953. PubMed  
 Carisey AF, et al. 2018. *Curr Biol.* 28:489. PubMed  
 Querfeld C, et al. 2018. *Cancer Immunol Res.* 6:900. PubMed  
 Schreurs RRCE et al. 2019. *Immunity.* 50(2):462-476 . PubMed  
 Claireaux M, et al. 2018. *MBio.* 9:e00317. PubMed  
 Swadling L, et al. 2020. *Cell Rep.* 30:687. PubMed"

anti human CD45RA - AlexaFluor700

Each lot of this antibody is quality control tested by immunofluorescent staining with flow cytometric analysis.

"Application References

Knapp W, et al. 1989. *Leucocyte Typing IV.* Oxford University Press. New York.  
 Yamada T, et al. 2002. *J. Biol. Chem.* 277:28830. (WB, Block)  
 Weninger W, et al. 2003. *J. Immunol.* 170:4638. (IHC-F)  
 Imanguli MM, et al. 2009. *Blood.* 113:3620 (IHC-P)  
 Roque S, et al. 2007. *J. Immunol.* 178:8028. (FC) PubMed  
 Smeltz RB. 2007. *J. Immunol.* 178:4786. (FC) PubMed  
 Palendira U, et al. 2008. *Blood (FC)* PubMed  
 Kuttruff S, et al. 2009. *Blood* 113:358. (FC) PubMed  
 Thakral D, et al. 2008. *J. Immunol.* 180:7431. (FC) PubMed  
 Alanio C, et al. 2010. *Blood* 115:3718. (FC) PubMed  
 Iannello A, et al. 2010. *J. Immunol.* 184:114. (FC) PubMed  
 Yoshino N, et al. 2000. *Exp. Anim. (Tokyo)* 49:97. (FC)

Product Citations

Palendira U, et al. 2008. *Blood.* 112:3293. PubMed  
 Payne R, et al. 2010. *J Virol.* 84:10453. PubMed  
 Alanio C, et al. 2010. *Blood.* 115:3718. PubMed  
 Carney E, et al. 2012. *J Immunol.* 189:261. PubMed  
 Alexander T, et al. 2013. *Ann Rheum Dis.* 72:1549. PubMed  
 Eriksson E, et al. 2012. *PLoS One.* 7:e51696. PubMed  
 Long H, et al. 2013. *J Exp Med.* 210:933. PubMed  
 Afzali B, et al. 2013. *Clin J Am Soc Nephrol.* 8:1396. PubMed  
 Eberhardt K, et al. 2015. *Clin Infect Dis.* 61: 1615 - 1623. PubMed  
 Pachnio A, et al. 2016. *PLoS Pathog.* 12: 1005832. PubMed  
 Muenchhoff M, et al. 2016. *Sci Transl Med.* 8: 358ra125. PubMed  
 Powell R, et al. 2017. *J Immunol.* 10.4049/jimmunol.1700114. PubMed"

anti human CD45RO-PE

Each lot of this antibody is quality control tested by immunofluorescent staining with flow cytometric analysis.

"Application References

Knapp W, et al. Eds. 1989. Leucocyte Typing IV. Oxford University Press. New York. (FC)  
 Ishii T, et al. 2001. P. Natl. Acad. Sci. USA 98:12138. (WB)  
 Ponsford M, et al. 2001. Clin. Exp. Immunol. 124:315. (IP)  
 Yamada M, et al. 1996. Stroke 27:1155. (IHC)  
 Sakkas LI, et al. 1998. Clin. Diagn. Lab. Immunol. 5:430. (IHC)  
 Baba N, et al. 2010. Int. Immunol. 22:237. PubMed  
 Thakral D, et al. 2008. J. Immunol. 180:7431. (FC) PubMed  
 Weiss L, et al. 2010. P. Natl. Acad. Sci. USA 107:10632. PubMed  
 Wu YY, et al. 2007. Infect. Immun. 75:4357. PubMed  
 Mozaffarian N, et al. 2008. Rheumatology 47:1335. PubMed  
 Roque S, et al. 2007. J. Immunol. 178:8028. PubMed  
 Yoshino N, et al. 2000. Exp. Anim. (Tokyo) 49:97. (FC)

Product Citations

Zhao B, et al. 2013. PLoS One. 8:77708. PubMed  
 Sutavani R, et al. 2013. J Immunol. 191:5895. PubMed  
 Iannetta M, et al. 2016. PLoS One. 11: 0160277. PubMed  
 Narsale A, Moya R, Robertson H 2016. Data Brief. 8: 1348-51. PubMed  
 Carisey AF, et al. 2018. Curr Biol. 28:489. PubMed  
 Murakami T, et al. 2018. Nat Commun. 9:2436. PubMed  
 Godbersen C, et al. 2017. Mol Cancer Ther. 16:1335. PubMed  
 Shan L, et al. 2017. Immunity. 47:766. PubMed"

Th17 and Tc17 analysis

Fixable viability dye - efluor450

As above

anti human CD4 - FITC

As above

anti-human CD8 - PE/Cy7

Each lot of this antibody is quality control tested by immunofluorescent staining with flow cytometric analysis.

"Application References

Schlossman S, et al. Eds. 1995. Leucocyte Typing V. Oxford University Press. New York.  
 Knapp W. 1989. Leucocyte Typing IV. Oxford University Press New York.  
 Barclay N, et al. 1997. The Leucocyte Antigen Facts Book. Academic Press Inc. San Diego.  
 Awasthi, S., et al. 2011. J. Virol 85:10472. PubMed  
 Coppieters KT, et al. 2012. J. Exp. Med. 209:51. (IHC, epitope)  
 Suzuki F, et al. 2012. Arthritis Res. Ther. 14:R48. (IHC)

Product Citations

Fujigaki J, et al. 2015. PLoS One. 10: 0132521. PubMed  
 Xia Y, et al. 2019. Gastroenterol Res Pract. 2019:5436961. PubMed  
 Ye C, et al. 2017. J Virol. 91:e01389-23. PubMed  
 Kacherovsky N, et al. 2019. Nat Biomed Eng. 0.66875. PubMed"

anti-human IL17 - PE

As above

Phosphostain (STAT1 and STAT3)

anti human CD4 - FITC

As above

STAT3 (pY705) - PE

"Bromberg J, Darnell JE. The role of STATs in transcriptional control and their impact on cellular function. Oncogene. 2000; 19 (21):2468-2473.

Imada K, Leonard WJ. The Jak-STAT pathway. Mol Immunol. 2000; 37:1-11.

Liu KD, Gaffen SL, Goldsmith MA. JAK/STAT signaling by cytokine receptors. Curr Opin Immunol. 1998; 10(3):271-278.

Renner ED, Rylaarsdam S, Anover-Sombke S, et al. Novel signal transducer and activator of transcription 3 (STAT3) mutations, reduced T(H)17 cell numbers, and variably defective STAT3 phosphorylation in hyper-IgE syndrome. J Allergy Clin Immunol. 2008; 122 (1):181-187.

Tanaka S, Saito Y, Kunisawa J, et al. Development of mature and functional human myeloid subsets in hematopoietic stem cell-engrafted NOD/SCID/IL2rgammaKO mice. J Immunol. 2012; 188(12):6145-6155. "

STAT1 (pY701) - Alexa 647

"Bromberg J, Darnell JE. The role of STATs in transcriptional control and their impact on cellular function. *Oncogene*. 2000; 19 (21):2468-2473.

Darnell JE Jr. STATs and gene regulation. *Science*. 1997; 277(5332):1630-1635.

Fu XY, Zhang JJ. Transcription factor p91 interacts with the epidermal growth factor receptor and mediates activation of the c-fos gene promoter. *Cell*. 1993; 74(6):1135-1145.

Perez OD, Mitchell D, Campos R, Gao GJ, Li L, Nolan GP. Multiparameter analysis of intracellular phosphoepitopes in immunophenotyped cell populations by flow cytometry. *Curr Protoc Cytom*. 2005; :6.20.1-6.20.22.

Suni MA, Maino VC. Flow cytometric analysis of cell signaling proteins. *Methods Mol Biol*. 2011; 717:155-169.

Tanaka S, Saito Y, Kunisawa J, et al. Development of mature and functional human myeloid subsets in hematopoietic stem cell-engrafted NOD/SCID/IL2rgammaKO mice. *J Immunol*. 2012; 188(12):6145-6155. "

NCC expression on lymphocytes

SLC12A3 Polyclonal antibody (rabbit)

"Testing of antibody performed according to datasheet:

SLC12A3 Antibody (PA5-80004) in IHC (P)

Immunohistochemistry analysis of SLC12A3 on paraffin-embedded mouse kidney tissue. Antigen retrieval was performed using citrate buffer (pH6, epitope retrieval solution) for 20 mins. Sample was blocked using 10% goat serum, incubated with SLC12A3 polyclonal antibody (Product# PA5-80004) with a dilution of 1 µg/mL (overnight at 4°C), and followed by biotinylated goat anti-rabbit IgG (30 minutes at 37° C). Development was performed using Streptavidin-Biotin-Complex (SABC) with DAB chromogen method.

SLC12A3 Antibody (PA5-80004) in IHC (P)

Immunohistochemistry analysis of SLC12A3 on paraffin-embedded rat kidney tissue. Antigen retrieval was performed using citrate buffer (pH6, epitope retrieval solution) for 20 mins. Sample was blocked using 10% goat serum, incubated with SLC12A3 polyclonal antibody (Product# PA5-80004) with a dilution of 1 µg/mL (overnight at 4° C), and followed by biotinylated goat anti-rabbit IgG (30 minutes at 37°C). Development was performed using Streptavidin-Biotin-Complex (SABC) with DAB chromogen method.

SLC12A3 Antibody (PA5-80004) in WB

Western blot analysis of SLC12A3 in Lane 1: mouse kidney tissue lysate using 50 µg (reducing conditions) per well. Electrophoresis was performed on 5-20% SDS-PAGE gel at 70V (Stacking gel) / 90V (Resolving gel) for 2-3 hours and protein was transferred to a nitrocellulose membrane at 150mA for 50-90 minutes. Sample was blocked with 5% Non-fat Milk/TBS for 1.5 hours at room temperature, incubated with SLC12A3 polyclonal antibody (Product # PA5-80004) at a dilution of 0.5 µg/mL (overnight at 4°C), followed by goat anti-rabbit IgG-HRP secondary antibody at a dilution of 1:10,000. Signal development was performed using a chemiluminescence (ECL) kit.

"

Goat anti-rabbit APC

"Cell metabolism

Caloric Restriction Leads to Browning of White Adipose Tissue through Type 2 Immune Signaling.

""A10931 was used in flow cytometry to investigate the effects of caloric restriction on beige fat""

Authors: Fabbiano S,Suárez-Zamorano N,Rigo D,Veyrat-Durebex C,Stevanovic Dokic A,Colin DJ,Trajkovski M

Epigenetics

Epigenetic silencing of miR-26A1 in chronic lymphocytic leukemia and

mantle cell lymphoma: Impact on EZH2 expression.

""A10931 was used in flow cytometry to examine miR26A1 methylation and expression levels in chronic lymphocytic leukemia and mantle cell lymphoma samples""

Authors: Kopparapu PK,Bhoi S,Mansouri L,Arabianian LS,Plevova K,Pospisilova S,Wasik AM,Croci GA,Sander B,Paulli M,Rosenquist R,Kanduri M"

anti human CD4 - FITC

As above

anti-human CD8 - PE/Cy7

As above

anti human CD45RA - AlexaFluor700

As above

anti human CD45 - FITC

Each lot of this antibody is quality control tested by immunofluorescent staining with flow cytometric analysis.

"Application References

Knapp W, et al. 1989. *Leucocyte Typing IV*. Oxford University Press. New York.

Kishihara K, et al. 1993. *Cell* 74:143.

Esser M, et al. 2001. *J. Virol*. 75:6173. (WB)



Yamada T, et al. 2002. *J. Biol. Chem.* 277:28830.  
 Nagano M, et al. 2007. *Blood* 110:151.  
 Jiang Q, et al. 2008. *Blood* 112:2858. PubMed  
 Morozov A, et al. 2010. *Clin Cancer Res.* 16:5630. PubMed  
 Yoshino N, et al. 2000. *Exp. Anim. (Tokyo)* 49:97. (FC)  
 Friedman T, et al. 1999. *J. Immunol.* 162:5256. (IHC)  
 Oeztuerk-Winder F, et al. 2012. *EMBO J.* 31:3431. (FC) PubMed  
 Rees LE, et al. 2003. *Clin. Exp. Immunol.* 134:497. (IF)  
 Lee J, et al. 2015. *J Exp Med.* 212:385. PubMed  
 Product Citations  
 Oeztuerk-Winder F, et al. 2012. *EMBO J.* 31:3431. PubMed  
 Hsieh J, et al. 2013. *Nucleic Acids Res.* 41:9753. PubMed  
 Didigu C, et al. 2014. *Blood.* 123:61. PubMed  
 Zhang B, et al. 2013. *PLoS One.* 8:57114. PubMed  
 Wang L, et al. 2014. *Proc Natl Acad Sci U S A.* 111:3146. PubMed  
 Skrbo N, et al. 2014. *PLoS One.* 9:113278. PubMed  
 Saunders L, et al. 2015. *Sci Transl Med.* 7: 302ra136. PubMed  
 Grove K, et al. 2016. *PLoS One.* 11: 0145961. PubMed  
 Pabst C, et al. 2016. *Blood.* 127: 2018-2027. PubMed  
 Genbacev O, et al. 2016. *Hum Reprod.* 31: 1300 - 1314. PubMed  
 Yuan Z, et al. 2016. *J Virol.* 90: 7728 - 7739. PubMed  
 S Tzeng 2016. *J Vis Exp.* 118:e54582. PubMed"

#### anti human CD3 - BV711

Each lot of this antibody is quality control tested by immunofluorescent staining with flow cytometric analysis.

#### "Application References

Schlossman S, et al. Eds. 1995. *Leucocyte Typing V.* Oxford University Press. New York.  
 Knapp W. 1989. *Leucocyte Typing IV.* Oxford University Press New York.  
 Barclay N, et al. 1997. *The Leucocyte Antigen Facts Book.* Academic Press Inc. San Diego.  
 Li B, et al. 2005. *Immunology* 116:487.  
 Jeong HY, et al. 2008. *J. Leukocyte Biol.* 83:755. PubMed  
 Alter G, et al. 2008. *J. Virol.* 82:9668. PubMed  
 Manevich-Mendelson E, et al. 2009. *Blood* 114:2344. PubMed  
 Pinto JP, et al. 2010. *Immunology.* 130:217. PubMed  
 Biggs MJ, et al. 2011. *J. R. Soc. Interface.* 8:1462. PubMed  
 Product Citations  
 Willmann K, et al. 2014. *Nat Commun.* 5:5360. PubMed  
 Kritikou J, et al. 2016. *Sci Rep.* 6:30636. PubMed  
 D'Antoni ML, et al. 2018. *J Acquir Immune Defic Syndr.* 79:108. PubMed  
 Cassetta L et al. 2019. *Cancer Cell.* 35(4):588-602 . PubMed  
 Powell WE, et al. 2018. *Diabetologia.* 61:1794. PubMed  
 Izadi D, et al. 2019. *Sci Adv.* 5:eaay0370. PubMed  
 Swadling L, et al. 2020. *Cell Rep.* 30:687. PubMed"

#### anti human CD56 - BV510

Each lot of this antibody is quality control tested by immunofluorescent staining with flow cytometric analysis.

#### "Application References

Kishimoto T, et al. Eds. 1997. *Leucocyte Typing VI.* Garland Publishing Inc. London.  
 Correia DV, et al. 2011. *Blood* 118:992. (FC) PubMed  
 Product Citations  
 Montel-Hagen A et al. 2019. *Cell stem cell.* 24(3):376-389 . PubMed  
 Abd Hamid M et al. 2019. *Cancer Immunol Res.* 7(8):1293-1306 . PubMed  
 Rölle A, et al. 2018. *Cell Rep.* 24:1967. PubMed"

#### anti human CD19 - PE/Cy7

#### "Frontiers in immunology

B and T Cell Phenotypic Profiles of African HIV-Infected and HIV-Exposed Uninfected Infants: Associations with Antibody Responses to the Pentavalent Rotavirus Vaccine.

""25-0199 was used in Flow cytometry/Cell sorting to examined associations between B and T cell phenotypic profiles and antibody responses to the pentavalent rotavirus vaccine in perinatally HIV-infected infants.""

Authors: Weinberg A,Lindsey J,Bosch R,Persaud D,Sato P,Ogwu A,Asmelash A,Bwakura-Dangarambezi M,Chi BH, Canniff J,Lockman S,Gaseitsiwe S,Moyo S,Smith CE,Moraka NO,Levin MJ

#### Nature communications

Peli1 negatively regulates noncanonical NF-B signaling to restrain systemic lupus erythematosus.

""Published figure using CD19 monoclonal antibody (Product # 25-0199-42) in Flow Cytometry""

Authors: Liu J,Huang X,Hao S,Wang Y,Liu M,Xu J,Zhang X,Yu T,Gan S,Dai D,Luo X,Lu Q,Mao C,Zhang Y,Shen N,Li B, Huang M,Zhu X,Jin J,Cheng X,Sun SC,Xiao Y"

## Calcium flux

## Indo-1, AM, cell permeant

"Measuring Intracellular Calcium Signaling in Murine NK Cells by Flow Cytometry  
Alexander W. MacFarlane, IV, James F. Oesterling, and Kerry S. Campbell."

## anti-human CD4 - PerCP/Cy5.5

Each lot of this antibody is quality control tested by immunofluorescent staining with flow cytometric analysis.

## "Application References

Knapp W, et al. 1989. Leucocyte Typing IV. Oxford University Press. New York. (Activ)

Moir S, et al. 1999. J. Virol. 73:7972. (Activ)

Deng MC, et al. 1995. Circulation 91:1647. (IHC)

Friedman T, et al. 1999. J. Immunol. 162:5256. (IHC)

Mack CL, et al. 2004. Pediatr. Res. 56:79. (IHC)

Lan RY, et al. 2006. Hepatology 43:729.

Zenaro E, et al. 2009. J. Leukoc. Biol. 86:1393. (FC) PubMed

Yoshino N, et al. 2000. Exp. Anim. (Tokyo) 49:97. (FC)

Stoeckius M, et al. 2017. Nat. Methods. 14:865. (PG)

## Product Citations

Sumitomo S, et al. 2013. J Immunol. 94:393. PubMed

Lu T, et al. 2016. PLoS One. 11: 0148044. PubMed

Beyer M, et al. 2016. Nat Immunol. 17:593-603. PubMed

Zakhour R, et al. 2016. Clin Infect Dis. 62: 1029-1035. PubMed

D'Antoni ML, et al. 2018. J Acquir Immune Defic Syndr. 79:108. PubMed

Washburn ML, et al. 2019. J Immunol. 203:1897. PubMed

Pollack RA, et al. 2017. Cell Host Microbe. 1.218055556. PubMed"

## biotinylated anti-human CD3

Each lot of this antibody is quality control tested by immunofluorescent staining with flow cytometric analysis.

## "Application References

Schlossman S, et al. Eds. 1995. Leucocyte Typing V. Oxford University Press. New York.

Knapp W. 1989. Leucocyte Typing IV. Oxford University Press New York.

Barclay N, et al. 1997. The Leucocyte Antigen Facts Book. Academic Press Inc. San Diego.

Li B, et al. 2005. Immunology 116:487.

Jeong HY, et al. 2008. J. Leukocyte Biol. 83:755. PubMed

Alter G, et al. 2008. J. Virol. 82:9668. PubMed

Manevich-Mendelson E, et al. 2009. Blood 114:2344. PubMed

Pinto JP, et al. 2010. Immunology. 130:217. PubMed

Biggs MJ, et al. 2011. J. R. Soc. Interface. 8:1462. PubMed

## Product Citations

Allegrezza M, et al. 2016. Cancer Res. 76: 2561 - 2572. PubMed

Sun J et al. 2018. Cell stem cell. 23(3):355-369. PubMed

Motsch V, et al. 2019. Sci Rep. 2.658333333. PubMed"

## IL23 receptor expression

## IL-23 receptor - PE

" Role of interleukin-23 in monocyte-derived dendritic cells of HBV-related acute-on-chronic liver failure and its correlation with the severity of liver damage

Authors: Suxia Bao

Clin Res Hepatol Gastroenterol, 2016;0(0):.

Species: Human

Sample Types: Whole Cells

Applications: Flow Cytometry

Resolving TYK2 locus genotype-to-phenotype differences in autoimmunity

Authors: Lars Fugger

Sci Transl Med, 2016;8(363):363ra149.

Species: Human

Sample Types: Whole Cells

Applications: Flow Cytometry

IL-34- and M-CSF-induced macrophages switch memory T cells into Th17 cells via membrane IL-1alpha.

Authors: Foucher E, Blanchard S, Preisser L, Descamps P, Ifrah N, Delneste Y, Jeannin P

Eur J Immunol, 2015;45(4):1092-102.

Species: Human

Sample Types: Whole Cells

Applications: FACS

Th17-related cytokines contribute to recall-like expansion/effector function of HMBPP-specific Vgamma2Vdelta2 T cells after Mycobacterium tuberculosis infection or vaccination.

Authors: Shen H, Wang Y, Chen C, Frencher J, Huang D, Yang E, Ryan-Payseur B, Chen Z  
Eur J Immunol, 2015;45(2):442-51.

Species: Primate - *Macaca fascicularis* (Crab-eating Monkey or Cynomolgus Macaque)

Sample Types: Whole Cells

Applications: Flow Cytometry

Complementary IL-23 and IL-27 anti-tumor activities cause strong inhibition of human follicular and diffuse large B-cell lymphoma growth in vivo.

Authors: Cocco C, Di Carlo E, Zupo S

Leukemia, 2012;26(6):1365-74.

Species: Human

Sample Types: Whole Cells

Applications: Flow Cytometry

"

Anti-human CD4 - FITC

As above

Monocyte analysis

anti-human CD14 - APC/Cy7

Each lot of this antibody is quality control tested by immunofluorescent staining with flow cytometric analysis.

"Application References

McMichael A, et al. 1987. Leucocyte Typing III. Oxford University Press. New York.

Knapp W, et al. Eds. 1989. Leucocyte Typing IV. Oxford University Press. New York.

Schlossman S, et al. Eds. 1995. Leucocyte Typing V. Oxford University Press. New York.

Product Citations

Beitnes AC, et al. 2012. PLoS One. 7:e33556. PubMed

Soriano-Sarabia N, et al. 2012. J Immunol. 189:5212. PubMed

Kuebler P, et al. 2015. Proc Natl Acad Sci U S A. 112: 8379 - 8384. PubMed

Schrøder M, et al. 2016. PLoS One. 11: 0157387. PubMed

Palamides P, et al. 2016. Dis Model Mech. 9: 985 - 997. PubMed

AC Belkina, JE Snyder-Cappione 2017. Cytometry A. 91:175-179. PubMed

Rajasekhar M, et al. 2017. J Autoimmun. 10.1016/j.jaut.2017.01.002. PubMed

Bravo-Flores E, et al. 2018. Int J Mol Sci. 19:E1074. PubMed

Friedensohn S, et al. 2018. Front Immunol. 9:1401. PubMed

Yang Z, et al. 2018. Front Immunol. 9:2613. PubMed

Roy Chowdhury R, et al. 2018. Nature. 560:644. PubMed

Nicholas DA et al. 2019. Cell Metab. 30(3):447-461 . PubMed"

anti-human CD16 - FITC

Each lot of this antibody is quality control tested by immunofluorescent staining with flow cytometric analysis.

"Application References

Knapp W, et al. Eds. 1989. Leucocyte Typing IV. Oxford University Press. New York.

Schlossman S, et al. Eds. 1995. Leucocyte Typing V. Oxford University Press. New York.

Edberg J, et al. 1997. J. Immunol. 159:3849. (IP)

Hoshino S, et al. 1991. Blood 78:3232. (Stim)

Tamm A, et al. 1996. Immunol. 157:1576. (Block)

Da Silva DM, et al. 2001. Int. Immunol. 13:633. (IHC)

Holl V, et al. 2004. J. Immunol. 173:6274. (Block)

Hober D, et al. 2002. J. Gen. Virol. 83:2169. (Block)

Brainard DM, et al. 2009. J. Virol. 83:7305. PubMed

Smed-Sørensen A, et al. 2008. Blood 111:5037. (Block) PubMed

Timmerman KL, et al. 2008. J. Leukoc. Biol. 84:1271. (FC) PubMed

Yoshino N, et al. 2000. Exp. Anim. (Tokyo) 49:97. (FC)

Product Citations

Okada T, et al. 2010. Am J Pathol. 176:2309. PubMed

Hunn M, et al. 2012. Clin Cancer Res. 18:6446. PubMed

Xue D, et al. 2013. Transplant Proc. 45:3279. PubMed

Poonia B, Pauza C 2014. PLoS One. 9:88884. PubMed

Søndergaard J, et al. 2014. Int Immunol. 26) : 705-16. PubMed

Bal S, et al. 2016. Nat Immunol. 10.1038/ni.3444. PubMed

Geng S, et al. 2016. Nat Commun. 7:13436. PubMed

AC Belkina, JE Snyder-Cappione 2017. Cytometry A. 91:175-179. PubMed

Gärtner K, et al. 2018. Cancer Med. 11:39. PubMed

Wang Y, et al. 2019. J Transl Med. 17:93. PubMed

Tong M, et al. 2019. J Immunol. 203:500. PubMed

Osorio FG et al. 2018. Cell reports. 25(9):2308-2316 . PubMed"

anti-human TNF - Alexafour488

"Danis VA, Franic GM, Rathjen DA, Brooks PM. Effects of granulocyte-macrophage colony-stimulating factor (GM-CSF), IL-2,

interferon-gamma (IFN-gamma), tumour necrosis factor-alpha (TNF-alpha) and IL-6 on the production of immunoreactive IL-1 and TNF-alpha by human monocytes. *Clin Exp Immunol.* 1991; 85(1):143-150. View reference

Jason J, Larned J. Single-cell cytokine profiles in normal humans: comparison of flow cytometric reagents and stimulation protocols. *J Immunol Methods.* 1997; 207(1):13-22. View reference

Prussin C, Metcalfe DD. Detection of intracytoplasmic cytokine using flow cytometry and directly conjugated anti-cytokine antibodies. *J Immunol Methods.* 1995; 188(1):117-128. View reference

Rathjen DA, Cowan K, Furphy LJ, Aston R. Antigenic structure of human tumour necrosis factor: recognition of distinct regions of TNF alpha by different tumour cell receptors. *Mol Immunol.* 1991; 28(1-2):79-86. View reference

Sander B, Andersson J, Andersson U. Assessment of cytokines by immunofluorescence and the paraformaldehyde-saponin procedure. *Immunol Rev.* 1991; 119:65-93. View reference

Sopper S, Stahl-Hennig C, Demuth M, Johnston IC, Dorries R, ter Meulen V. Lymphocyte subsets and expression of differentiation markers in blood and lymphoid organs of rhesus monkeys. *Cytometry.* 1997; 29(4):351-362. View reference

Verdier F, Aujoulat M, Condevaux F, Descotes J. Determination of lymphocyte subsets and cytokine levels in cynomolgus monkeys. *Toxicology.* 1995; 105(1):81-90. View reference"

#### NK cell analysis

anti human CD45 - FITC

As above

anti human CD3 - BV711

As above

anti human CD56 - BV510

As above

anti human CD16 - PE/Cy7

Each lot of this antibody is quality control tested by immunofluorescent staining with flow cytometric analysis.

#### "Application References

Knapp W, et al. Eds. 1989. *Leucocyte Typing IV.* Oxford University Press. New York.

Schlossman S, et al. Eds. 1995. *Leucocyte Typing V.* Oxford University Press. New York.

Edberg J, et al. 1997. *J. Immunol.* 159:3849. (IP)

Hoshino S, et al. 1991. *Blood* 78:3232. (Stim)

Tamm A, et al. 1996. *Immunol.* 157:1576. (Block)

Da Silva DM, et al. 2001. *Int. Immunol.* 13:633. (IHC)

Holl V, et al. 2004. *J. Immunol.* 173:6274. (Block)

Hober D, et al. 2002. *J. Gen. Virol.* 83:2169. (Block)

Brainard DM, et al. 2009. *J. Virol.* 83:7305. PubMed

Smed-Sørensen A, et al. 2008. *Blood* 111:5037. (Block) PubMed

Timmerman KL, et al. 2008. *J. Leukoc. Biol.* 84:1271. (FC) PubMed

Yoshino N, et al. 2000. *Exp. Anim. (Tokyo)* 49:97. (FC)

#### Product Citations

Brainard D, et al. 2009. *J Virol.* 83:7305. PubMed

Wilson E, et al. 2014. *J Infect Dis.* 210:1396. PubMed

Mohanty S, et al. 2015. *J Infect Dis.* 211:1174. PubMed

Collison J, et al. 2015. *J Immunol.* 195: 1162-1170. PubMed

Llewellyn D, et al. 2015. *Sci Rep.* 5: 14081. PubMed

Demers K, et al. 2016. *PLoS Pathog.* 12: 1005805. PubMed

Lee J, et al. 2017. *PLoS One.* 10.1371/journal.pone.0183594. PubMed

Walk J, et al. 2019. *Nat Commun.* 10:874. PubMed

Kong XF, et al. 2018. *Nat Immunol.* 19:973. PubMed

Loelius SG et al. 2018. *Current protocols in toxicology.* 76(1):e46 . PubMed

He W et al. 2018. *Immunity.* 49(6):1175-1190 . PubMed

Dos Santos JC et al. 2019. *Cell Rep.* 28(10):2659-2672 . Pub"

anti human IFNg - APC

As above

#### WESTERN BLOT

##### Rabbit SGK1 polyclonal antibody

Wang Y et al. Mechanism of Regulation of Big-Conductance Ca<sup>2+</sup>-Activated K<sup>+</sup> Channels by mTOR Complex 2 in Podocytes. *Front Physiol* 10:167 (2019). PubMed: 30873046  
 Essig K et al. Roquin targets mRNAs in a 3'-UTR-specific manner by different modes of regulation. *Nat Commun* 9:3810 (2018). PubMed: 30232334  
 Yuan M et al. Environmentally relevant levels of bisphenol A affect uterine decidualization and embryo implantation through the estrogen receptor/serum and glucocorticoid-regulated kinase 1/

epithelial sodium ion channel  $\alpha$ -subunit pathway in a mouse model. *Fertil Steril* 109:735-744.e1 (2018). PubMed: 29605410Wu C et al. SGK1 Governs the Reciprocal Development of Th17 and Regulatory T Cells. *Cell Rep* 22:653-665 (2018). ICC/IF ; Mouse . PubMed: 29346764Hayward CE et al. Mechanisms Underpinning Adaptations in Placental Calcium Transport in Normal Mice and Those With Fetal Growth Restriction. *Front Endocrinol (Lausanne)* 9:671 (2018). PubMed: 30515131Caohuy H et al. Activation of 3-phosphoinositide-dependent kinase 1 (PDK1) and serum- and glucocorticoid-induced protein kinase 1 (SGK1) by short-chain sphingolipid C4-ceramide rescues the trafficking defect of  $\beta$ 508-cystic fibrosis transmembrane conductance regulator ( $\beta$ 508-CFTR). *J Biol Chem* 289:35953-68 (2014). PubMed: 25384981Spangle JM & Munger K The human papillomavirus type 16 E6 oncoprotein activates mTORC1 signaling and increases protein synthesis. *J Virol* 84:9398-407 (2010). WB ; Human . PubMed: 20631133

#### Mouse GAPDH monoclonal antibody

He B et al. MicroRNA-326 decreases tau phosphorylation and neuron apoptosis through inhibition of the JNK signaling pathway by targeting VAV1 in Alzheimer's disease. *J Cell Physiol* 235:480-493 (2020). PubMed: 31385301Sun H et al. miR-4429 sensitized cervical cancer cells to irradiation by targeting RAD51. *J Cell Physiol* 235:185-193 (2020). PubMed: 31190335Li L et al. XIST/miR-376c-5p/OPN axis modulates the influence of proinflammatory M1 macrophages on osteoarthritis chondrocyte apoptosis. *J Cell Physiol* 235:281-293 (2020). PubMed: 31215024Xu J & Zhang J LncRNA TP73-AS1 is a novel regulator in cervical cancer via miR-329-3p/ARF1 axis. *J Cell Biochem* 121:344-352 (2020). PubMed: 31232491Doccini S et al. Proteomic and functional analyses in disease models reveal CLN5 protein involvement in mitochondrial dysfunction. *Cell Death Discov* 6:18 (2020). WB ; Human . PubMed: 32257390

#### Anti-rabbit HRP

Zhang J et al. MicroRNA-132 protects H9c2 cells against oxygen and glucose deprivation-evoked injury by targeting FOXO3A. *J Cell Physiol* 235:176-184 (2020). PubMed: 31210352Xi X et al. MicroRNA-204-3p represses colon cancer cells proliferation, migration, and invasion by targeting HMG2. *J Cell Physiol* 235:1330-1338 (2020). PubMed: 31286521Zhao DY et al. Ligustilide protects PC12 cells from oxygen-glucose deprivation/reoxygenation-induced apoptosis via the LKB1-AMPK-mTOR signaling pathway. *Neural Regen Res* 15:473-481 (2020). PubMed: 31571659Dai L et al. Knockdown of long non-coding RNA LINC00176 suppresses ovarian cancer progression by BCL3-mediated down-regulation of ceruloplasmin. *J Cell Mol Med* 24:202-213 (2020). PubMed: 31668012Shang D et al. Pancreatic cancer cell-derived exosomal microRNA-27a promotes angiogenesis of human microvascular endothelial cells in pancreatic cancer via BTG2. *J Cell Mol Med* 24:588-604 (2020). PubMed: 31724333

#### Anti-mouse HRP

Cai X et al. miR-124a enhances therapeutic effects of bone marrow stromal cells transplant on diabetic nephropathy-related epithelial-to-mesenchymal transition and fibrosis. *J Cell Biochem* 121:299-312 (2020). PubMed: 31190436Wang X et al. MicroRNA-576-5p enhances the invasion ability of trophoblast cells in preeclampsia by targeting TFAP2A. *Mol Genet Genomic Med* 8:e1025 (2020). PubMed: 31701656Cheng J et al. ACSL4 suppresses glioma cells proliferation via activating ferroptosis. *Oncol Rep* 43:147-158 (2020). PubMed: 31789401Wang X et al. Long non-coding RNA LINC00473/miR-195-5p promotes glioma progression via YAP1-TEAD1-Hippo signaling. *Int J Oncol* 56:508-521 (2020). PubMed: 31894297Gan J et al. Circular RNA\_101237 mediates anoxia/reoxygenation injury by targeting let-7a-5p/IGF2BP3 in cardiomyocytes. *Int J Mol Med* 45:451-460 (2020). PubMed: 31894303

## Human research participants

Policy information about [studies involving human research participants](#)

### Population characteristics

We investigate immunity in 47 patients with genotyped SLT and 46 age-matched healthy and disease controls. 23 (49%) patients have BS, 22 (47%) patients have GS, and 2 (4%) patients have EAST syndrome. The median age of SLT patients is 35 (28-43) years and 26 (55.3%) patients are female. Biochemical findings at the time of recruitment are typical of SLT, with hypokalaemic metabolic alkalosis and frequent hypomagnesaemia. Renin or aldosterone is elevated in 24 (96%) of the 25 SLT patients in whom they are measured.

### Recruitment

Patients with genotyped BS, GS, or EAST syndrome were recruited from the Royal Free Hospital and Great Ormond Street Hospital Tubular Disorders Clinics, London, UK. A pragmatic approach was undertaken and as many patients as possible were enrolled within the study time period. Disease controls were recruited from the same specialist tubular clinics as the SLT patients. These were patients with a non-salt losing tubulopathy. A similar pragmatic approach was undertaken with as many of these patients as possible enrolled within the study time period with the total number of controls at any one time matching the number of SLT patients. A non selective approach was undertaken and medical history was not known at the time of recruitment to avoid bias. Healthy controls were recruited from the University and Hospitals where the research was undertaken. These were age and sex matched to the SLT patients.

### Ethics oversight

The Royal Free Hospital Research and Development committee approved the study (identification number 7727) and all participants provided written informed consent prior to enrollment. Consent was also obtained to publish patient identifiable images where appropriate.

Note that full information on the approval of the study protocol must also be provided in the manuscript.

## Plots

Confirm that:

- The axis labels state the marker and fluorochrome used (e.g. CD4-FITC).
- The axis scales are clearly visible. Include numbers along axes only for bottom left plot of group (a 'group' is an analysis of identical markers).
- All plots are contour plots with outliers or pseudocolor plots.
- A numerical value for number of cells or percentage (with statistics) is provided.

## Methodology

Sample preparation

PBMCs were isolated from whole blood using density centrifugation as detailed within the methods section. In certain experiments, magnetic bead isolation of cells was undertaken and this is also detailed within the relevant section in the methods.

Instrument

BD-Fortessa

Software

Flow Jo

Cell population abundance

These have been provided as percentages in the relevant FACS plots

Gating strategy

Gating was determined by fluorescence minus one and this is detailed within the methods section of the manuscript

- Tick this box to confirm that a figure exemplifying the gating strategy is provided in the Supplementary Information.
